# Supplementary material
Source: publisher figshare collection journal article supplement (https://brill.figshare.com/articles/dataset/_/15155682)
Supplement: Supplementary file 1 [file 1]

**Integrative systematics illuminates the relationships in two sponge-associated hydrozoan families (Capitata: Sphaerocorynidae and Zancleopsidae)**

*Davide Maggioni* | ORCID: 0000-0003-0508-3987

Department of Earth and Environmental Sciences (DISAT), University of Milano-Bicocca,  
20126 Milano, Italy

Marine Research and High Education (MaRHE) Center, University of Milano-Bicocca, 12030  
Faafu Magoodhoo Island, Republic of Maldives

*davide.maggioni@unimib.it*

*Peter Schuchert* | ORCID: 0000-0001-8195-8031

Muséum d'Histoire Naturelle, 1208 Geneva, Switzerland

*Roberto Arrigoni* | ORCID: 0000-0002-6825-6331

Department of Biology and Evolution of Marine Organisms (BEOM), Stazione Zoologica  
Anton Dohrn, 80121 Naples, Italy

*Bert W. Hoeksema* | ORCID: 0000-0001-8259-3783

Taxonomy, Systematics and Geodiversity Group, Naturalis Biodiversity Center, 2300 RA  
Leiden, The Netherlands

Groningen Institute for Evolutionary Life Sciences, University of Groningen, 9700 CC  
Groningen, The Netherlands

*Danwei Huang* | ORCID: 0000-0003-3365-5583

Department of Biological Sciences, Tropical Marine Science Institute and Centre for Nature-  
based Climate Solutions, National University of Singapore, 117558 Singapore, Singapore

*Giovanni Strona* | ORCID: 0000-0003-2294-4013

Faculty of Biological and Environmental Sciences, University of Helsinki, 00790 Helsinki,  
Finland

*Davide Seveso* | ORCID: 0000-0001-7755-7067

Department of Earth and Environmental Sciences (DISAT), University of Milano-Bicocca,  
20126 Milano, Italy

Marine Research and High Education (MaRHE) Center, University of Milano-Bicocca, 12030  
Faafu Magoodhoo Island, Republic of Maldives

*Michael L. Berumen* | ORCID: 0000-0003-2463-2742

Red Sea Research Center, Division of Biological and Environmental Science and Engineering, King Abdullah University of Science and Technology (KAUST), 23955-6900 Thuwal, Saudi Arabia

*Enrico Montalbetti* | ORCID: 0000-0003-3932-1349

Department of Earth and Environmental Sciences (DISAT), University of Milano-Bicocca, 20126 Milano, Italy

Marine Research and High Education (MaRHE) Center, University of Milano-Bicocca, 12030 Faafu Magoodhoo Island, Republic of Maldives

*Richard Collins* | ORCID: 0000-0002-6225-444X

Independent researcher, Florida Museum of Natural History, 3215 Gainesville, Florida, USA

*Paolo Galli* | ORCID: 0000-0002-6065-8192

Department of Earth and Environmental Sciences (DISAT), University of Milano-Bicocca, 20126 Milano, Italy

Marine Research and High Education (MaRHE) Center, University of Milano-Bicocca, 12030 Faafu Magoodhoo Island, Republic of Maldives

*Simone Montano* | ORCID: 0000-0002-6612-8731

Department of Earth and Environmental Sciences (DISAT), University of Milano-Bicocca,  
20126 Milano, Italy

Marine Research and High Education (MaRHE) Center, University of Milano-Bicocca, 12030  
Faafu Magoodhoo Island, Republic of Maldives

**Supplementary material**

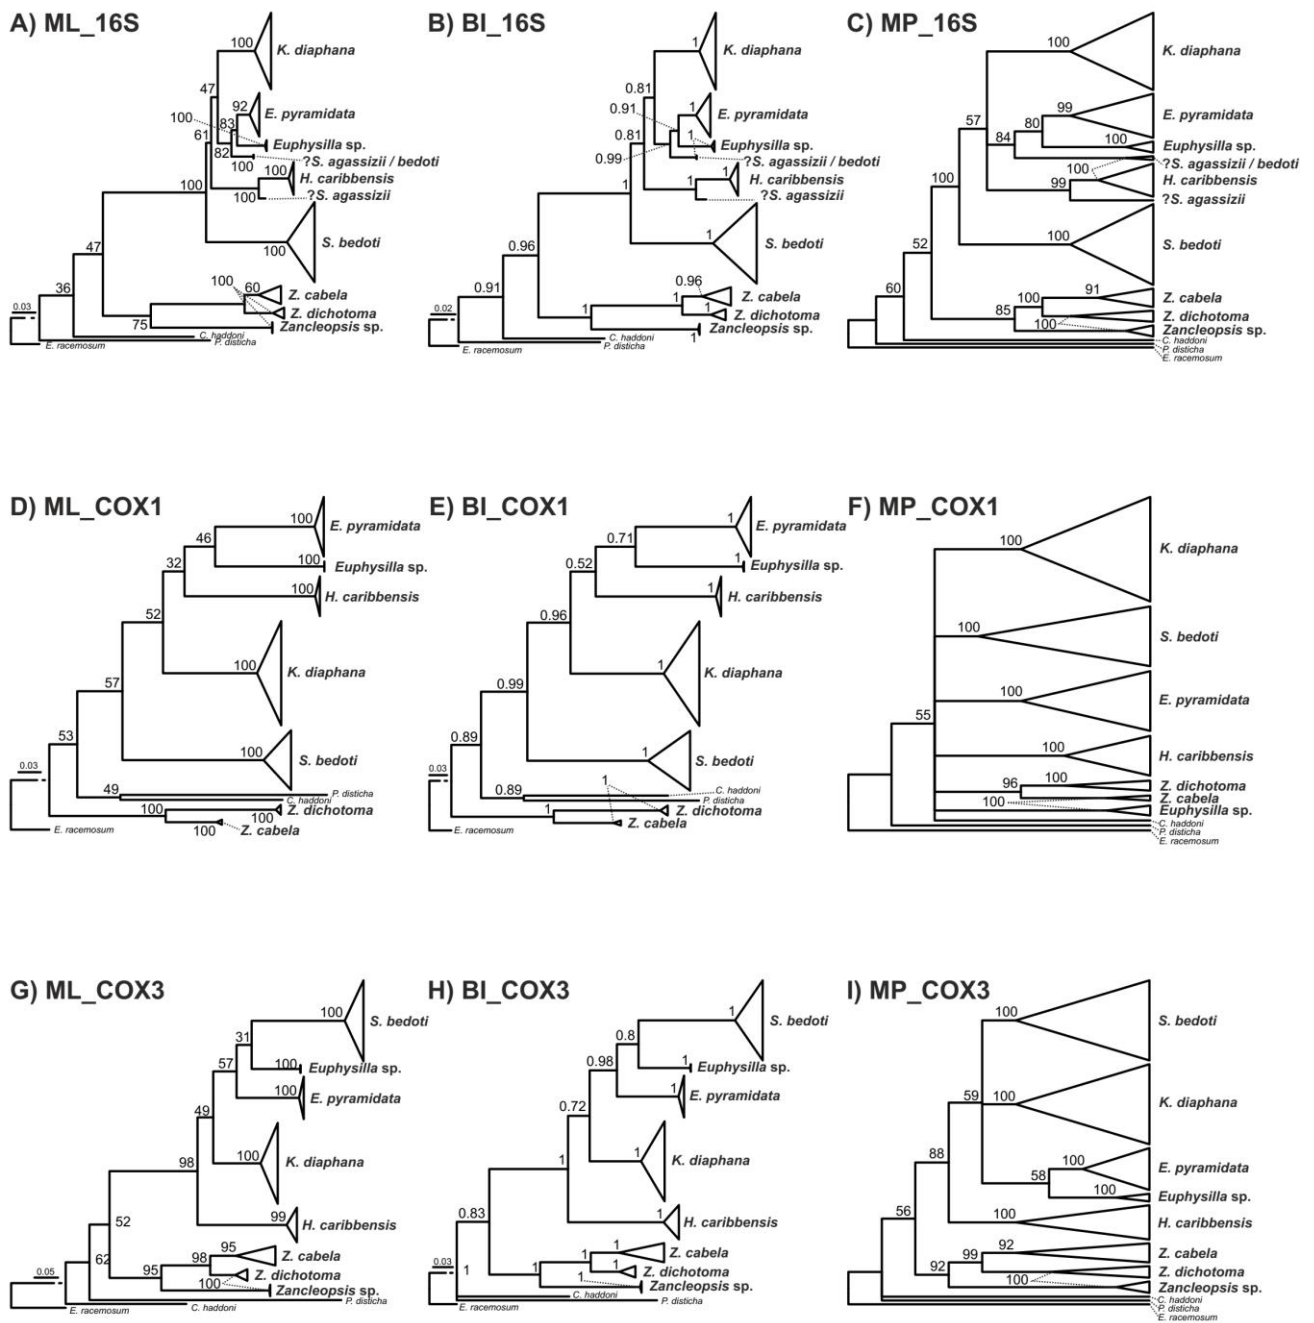

FIGURE S1 Single-locus phylogenetic analyses based on mitochondrial regions. ML: maximum likelihood. BI: Bayesian inference. MP: maximum parsimony

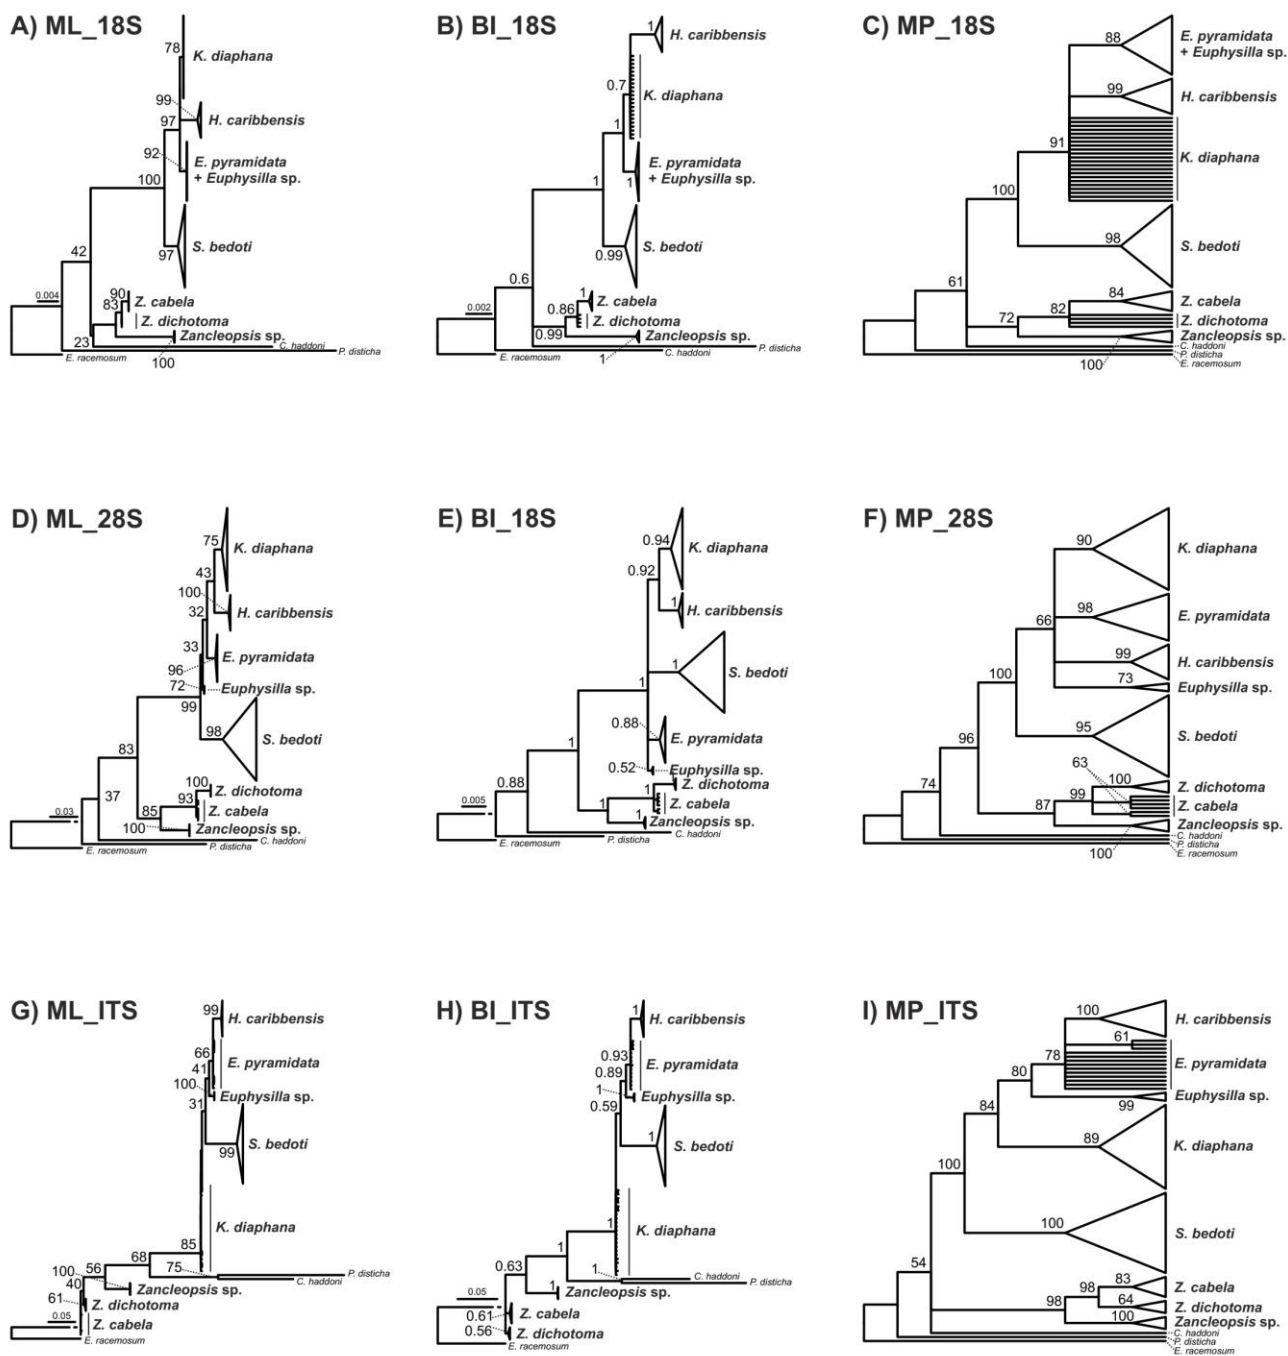

FIGURE S2 Single-locus phylogenetic analyses based on nuclear regions. ML: maximum likelihood. BI: Bayesian inference. MP: maximum parsimony

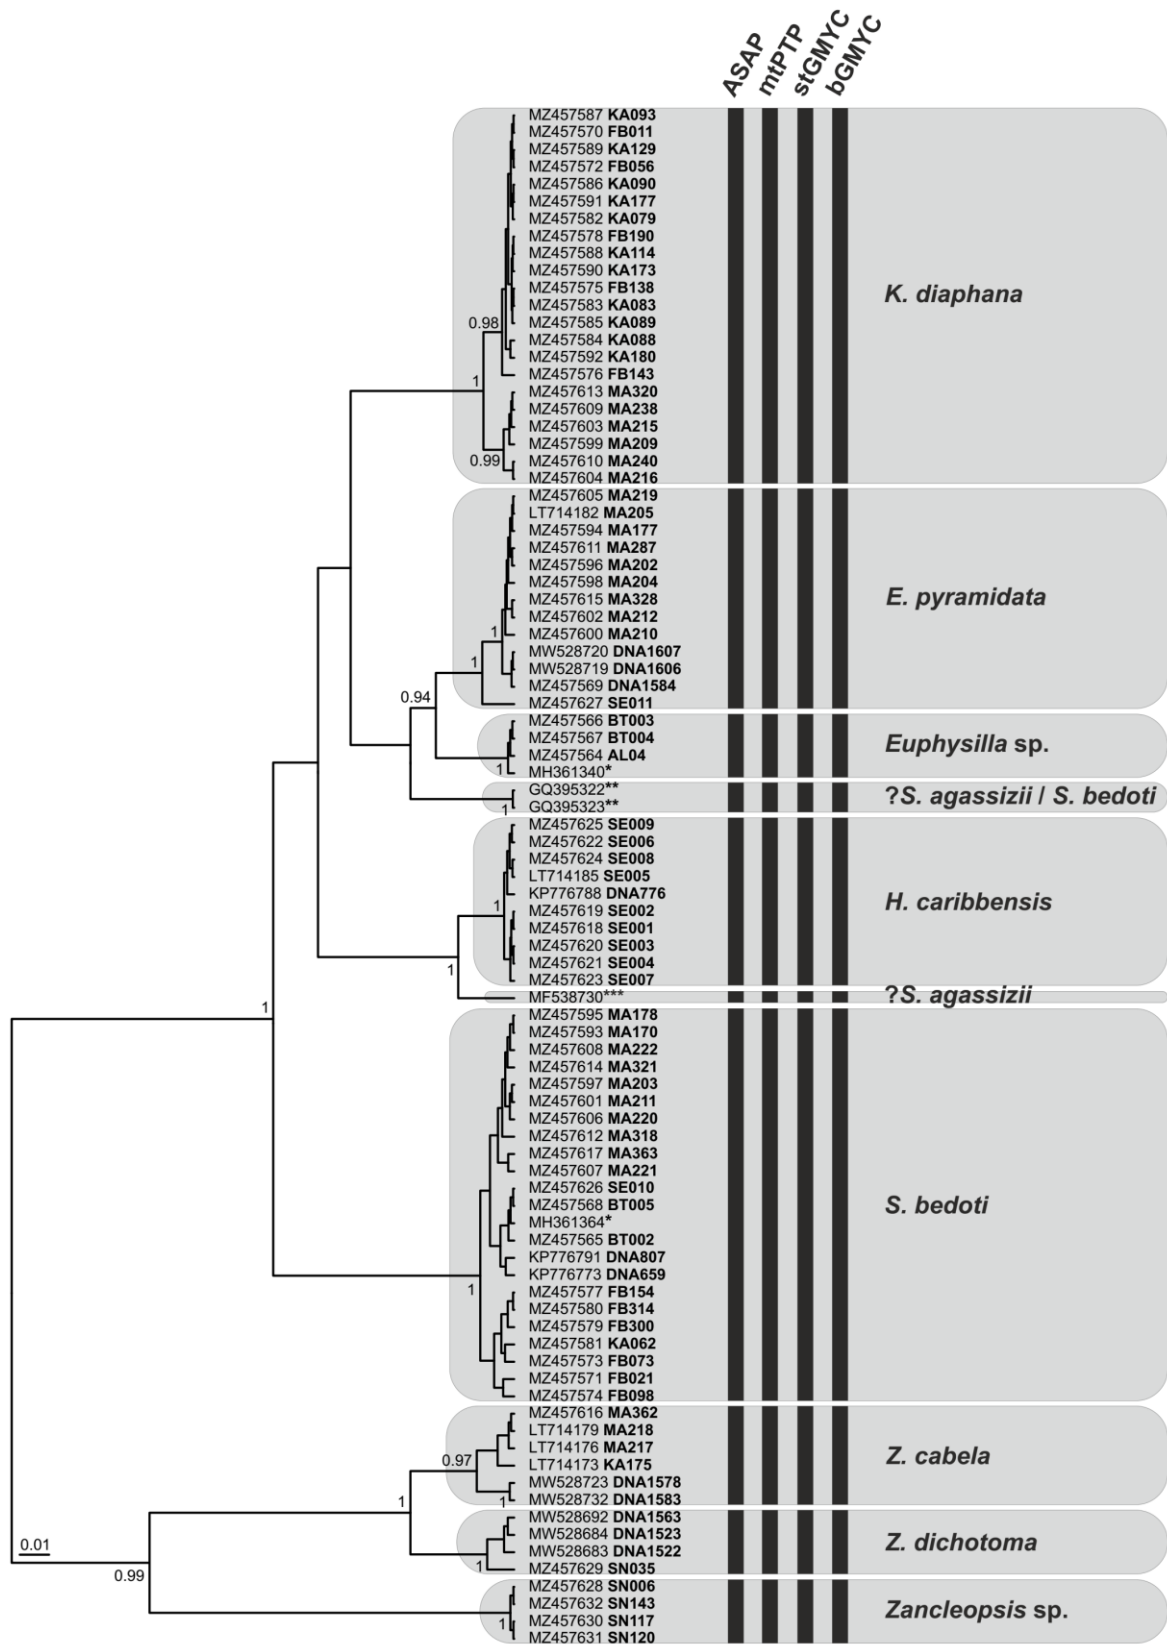

\*Miglietta et al. (2018) \*\*Nawrocki et al. (2010) \*\*\*Mendoza-Becerril et al. (2018)

FIGURE S3 Species delimitation summary based on 16S rRNA. Samples examined in this study are in bold
